# Supplementary material for: Temperature-Responsive Photoluminescence and Elastic Properties of 1D Lead Halide Perovskites R- and S-(Methylbenzylamine)PbBr3
Source: MDPI journal article supplement (doi:10.3390/molecules27030728), 2022-01-23
Supplement: s1 [file s1]

## Supporting Information

# Temperature-Responsive Photoluminescence and Elastic Properties of 1D Lead Halide Perovskites *R*- and *S*-(methylbenzylamine)PbBr<sub>3</sub>

Rui Feng <sup>1</sup>, Jia-Hui Fan <sup>2</sup>, Kai Li <sup>2</sup>, Zhi-Gang Li <sup>2</sup>, Yan Qin <sup>3</sup>, Zi-Ying Li <sup>2</sup>, Wei Li <sup>2,\*</sup> and Xian-He Bu <sup>1,2</sup>

<sup>1</sup> College of Chemistry & State Key Lab of Elemento-Organic Chemistry, Nankai University, Tianjin 300071, China; fengrui1226@hotmail.com (R.F.); buxh@nankai.edu.cn (X.-H.B.)

<sup>2</sup> School of Materials Science and Engineering & Tianjin Key Laboratory of Metal and Molecule-Based Material Chemistry, Nankai University, Tianjin 300350, China; asfjhh@163.com (J.-H.F.); 1120180353@mail.nankai.edu.cn (K.L.); 1120200436@mail.nankai.edu.cn (Z.-G.L.); 1120210484@mail.nankai.edu.cn (Z.-Y.L.)

<sup>3</sup> School of Physics & Wuhan National Laboratory for Optoelectronics, Huazhong University of Science and Technology, Wuhan 430074, China; qinyan@hust.edu.cn

\* Correspondence: wl276@nankai.edu.cn

**Table S1.** The cell parameters of *S*-MBAPbBr<sub>3</sub> at different temperatures.

| <i>T</i> (K) | <i>a</i> (Å) | <i>b</i> (Å) | <i>c</i> (Å) | $\alpha=\beta=\gamma$ (°) | <i>V</i> (Å <sup>3</sup> ) |
|--------------|--------------|--------------|--------------|---------------------------|----------------------------|
| 100          | 7.883        | 8.074        | 20.126       | 90                        | 1281.075                   |
| 120          | 7.887        | 8.080        | 20.157       | 90                        | 1284.613                   |
| 140          | 7.890        | 8.085        | 20.190       | 90                        | 1288.264                   |
| 160          | 7.893        | 8.094        | 20.221       | 90                        | 1291.942                   |
| 180          | 7.897        | 8.100        | 20.262       | 90                        | 1296.284                   |
| 200          | 7.901        | 8.108        | 20.303       | 90                        | 1300.806                   |
| 220          | 7.905        | 8.114        | 20.349       | 90                        | 1305.391                   |
| 240          | 7.910        | 8.120        | 20.399       | 90                        | 1310.404                   |
| 260          | 7.917        | 8.125        | 20.435       | 90                        | 1314.566                   |

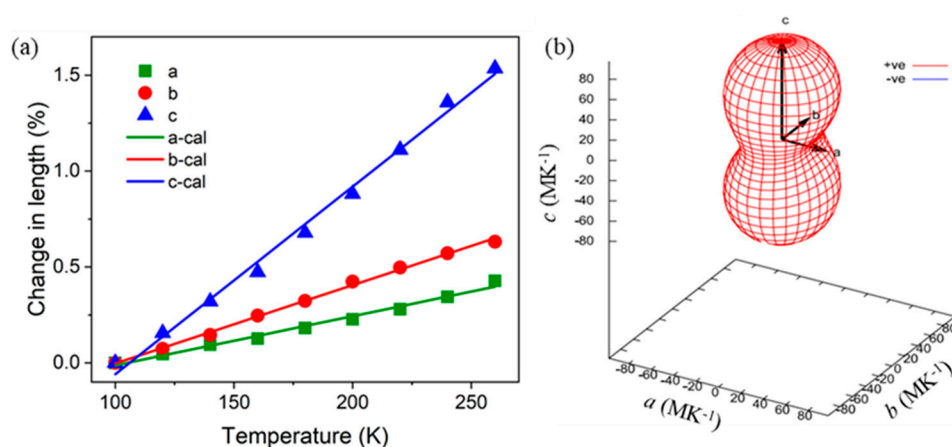**Figure S1.** The change of cell parameters of *S*-MBAPbBr<sub>3</sub> at different temperatures (a) and the diagram of thermal expansion (b).**Table S2.** The crystal data and structure refinement for *S*-MBAPbBr<sub>3</sub> at 100 K and 293 K.

| Identification code                    | <i>S</i> -MBAPbBr <sub>3</sub> -100 K              | <i>S</i> -MBAPbBr <sub>3</sub> -293 K              |
|----------------------------------------|----------------------------------------------------|----------------------------------------------------|
| Empirical formula                      | C <sub>8</sub> H <sub>12</sub> Br <sub>3</sub> NPb | C <sub>8</sub> H <sub>12</sub> Br <sub>3</sub> NPb |
| Formula weight                         | 569.11                                             | 569.11                                             |
| Temperature/K                          | 100.00(10)                                         | 293(2)                                             |
| Crystal system                         | Orthorhombic                                       | orthorhombic                                       |
| Space group                            | P2 <sub>1</sub> 2 <sub>1</sub> 2 <sub>1</sub>      | P2 <sub>1</sub> 2 <sub>1</sub> 2 <sub>1</sub>      |
| <i>a</i> /Å                            | 7.8835(3)                                          | 7.91780(10)                                        |
| <i>b</i> /Å                            | 8.0680(3)                                          | 8.13630(10)                                        |
| <i>c</i> /Å                            | 20.1237(8)                                         | 20.5574(3)                                         |
| Volume/Å <sup>3</sup>                  | 1279.95(9)                                         | 1324.34(3)                                         |
| <i>Z</i>                               | 4                                                  | 4                                                  |
| $\rho_{\text{calc}}$ g/cm <sup>3</sup> | 2.953                                              | 2.854                                              |
| $\mu$ /mm <sup>-1</sup>                | 22.507                                             | 35.067                                             |
| <i>F</i> (000)                         | 1016.0                                             | 1016.0                                             |
| Crystal size/mm <sup>3</sup>           | 30 × 35 × 70                                       | 30 × 35 × 70                                       |
| Radiation                              | MoK $\alpha$ ( $\lambda$ = 0.71073 Å)              | CuK $\alpha$ ( $\lambda$ = 1.54184 Å)              |
| 2 $\theta$ range for data              | 7.226 to 50.044                                    | 8.602 to 133.102                                   |

|                                                |                                                               |                                                               |
|------------------------------------------------|---------------------------------------------------------------|---------------------------------------------------------------|
| collection/°                                   |                                                               |                                                               |
| Index ranges                                   | $-9 \leq h \leq 9, -9 \leq k \leq 9, -23 \leq l \leq 23$      | $-8 \leq h \leq 9, -9 \leq k \leq 9, -24 \leq l \leq 23$      |
| Reflections collected                          | 5033                                                          | 5348                                                          |
| Independent reflections                        | 2166 [ $R_{\text{int}} = 0.0524, R_{\text{sigma}} = 0.0491$ ] | 2343 [ $R_{\text{int}} = 0.0493, R_{\text{sigma}} = 0.0529$ ] |
| Data/restraints/parameters                     | 2166/0/121                                                    | 2343/0/121                                                    |
| Goodness-of-fit on $F^2$                       | 1.041                                                         | 1.021                                                         |
| Final R indexes [ $I \geq 2\sigma(I)$ ]        | $R_1 = 0.0449, wR_2 = 0.1061$                                 | $R_1 = 0.0410, wR_2 = 0.1055$                                 |
| Final R indexes [all data]                     | $R_1 = 0.0467, wR_2 = 0.1071$                                 | $R_1 = 0.0416, wR_2 = 0.1061$                                 |
| Largest diff. peak/hole / $e \text{ \AA}^{-3}$ | 3.07/-1.59                                                    | 3.29/-1.26                                                    |
| Flack parameter                                | 0.01(2)                                                       | -0.006(11)                                                    |

**Table S3.** Bond lengths for *S*-MBAPbBr<sub>3</sub>-100 K.

| Atom                                                        | Atom             | Length/Å   | Atom | Atom | Length/Å |
|-------------------------------------------------------------|------------------|------------|------|------|----------|
| Pb1                                                         | Br1              | 2.8835(16) | C4   | C2   | 1.40(2)  |
| Pb1                                                         | Br3              | 2.8565(16) | C4   | C3   | 1.51(2)  |
| Pb1                                                         | Br2 <sup>1</sup> | 2.9690(16) | C4   | C7   | 1.40(2)  |
| Pb1                                                         | Br2              | 3.0617(16) | C6   | C8   | 1.38(2)  |
| Br2                                                         | Pb1 <sup>2</sup> | 2.9690(16) | C6   | C2   | 1.40(2)  |
| N1                                                          | C3               | 1.51(2)    | C8   | C5   | 1.37(2)  |
| C9                                                          | C3               | 1.51(2)    | C5   | C7   | 1.41(2)  |
| <sup>1</sup> 1/2+X,3/2-Y,1-Z; <sup>2</sup> -1/2+X,3/2-Y,1-Z |                  |            |      |      |          |

**Table S4.** Bond angles for *S*-MBAPbBr<sub>3</sub>-100 K.

| Atom                                                        | Atom | Atom             | Angle/°   | Atom | Atom | Atom | Angle/°   |
|-------------------------------------------------------------|------|------------------|-----------|------|------|------|-----------|
| Br1                                                         | Pb1  | Br2              | 87.44(4)  | C7   | C4   | C3   | 120.9(14) |
| Br1                                                         | Pb1  | Br2 <sup>1</sup> | 93.94(4)  | C8   | C6   | C2   | 118.9(16) |
| Br3                                                         | Pb1  | Br1              | 87.64(5)  | C5   | C8   | C6   | 121.9(16) |
| Br3                                                         | Pb1  | Br2 <sup>1</sup> | 83.70(4)  | C4   | C2   | C6   | 120.4(15) |
| Br3                                                         | Pb1  | Br2              | 82.26(4)  | C8   | C5   | C7   | 120.0(15) |
| Br2 <sup>1</sup>                                            | Pb1  | Br2              | 165.82(4) | N1   | C3   | C9   | 109.0(14) |
| Pb1 <sup>2</sup>                                            | Br2  | Pb1              | 82.77(4)  | N1   | C3   | C4   | 108.6(13) |
| C2                                                          | C4   | C3               | 119.1(14) | C9   | C3   | C4   | 115.7(15) |
| C2                                                          | C4   | C7               | 119.9(15) | C4   | C7   | C5   | 118.9(15) |
| <sup>1</sup> 1/2+X,3/2-Y,1-Z; <sup>2</sup> -1/2+X,3/2-Y,1-Z |      |                  |           |      |      |      |           |

**Table S5.** Bond lengths for *S*-MBAPbBr<sub>3</sub>-293 K.

| Atom | Atom             | Length/Å   | Atom | Atom | Length/Å |
|------|------------------|------------|------|------|----------|
| Pb1  | Br3              | 2.8939(14) | C3   | C4   | 1.37(2)  |
| Pb1  | Br2              | 2.8521(14) | C3   | C8   | 1.37(2)  |
| Pb1  | Br1              | 2.9861(14) | C2   | C1   | 1.50(2)  |
| Pb1  | Br1 <sup>1</sup> | 3.0696(14) | C6   | C7   | 1.36(3)  |

|                                                             |                  |            |    |    |         |
|-------------------------------------------------------------|------------------|------------|----|----|---------|
| Br1                                                         | Pb1 <sup>2</sup> | 3.0695(14) | C6 | C5 | 1.36(3) |
| N1                                                          | C1               | 1.527(17)  | C4 | C5 | 1.40(2) |
| C3                                                          | C1               | 1.501(19)  | C8 | C7 | 1.39(3) |
| <sup>1</sup> 1/2+X,3/2-Y,1-Z; <sup>2</sup> -1/2+X,3/2-Y,1-Z |                  |            |    |    |         |

**Table S6.** Bond angles for *S*-MBAPbBr<sub>3</sub>-293 K.

| Atom                                                        | Atom | Atom             | Angle/°   | Atom | Atom | Atom | Angle/°   |
|-------------------------------------------------------------|------|------------------|-----------|------|------|------|-----------|
| Br3                                                         | Pb1  | Br1              | 93.50(4)  | C8   | C3   | C4   | 118.5(14) |
| Br3                                                         | Pb1  | Br1 <sup>1</sup> | 88.26(4)  | C3   | C1   | N1   | 108.4(11) |
| Br2                                                         | Pb1  | Br3              | 88.77(4)  | C2   | C1   | N1   | 108.2(12) |
| Br2                                                         | Pb1  | Br1              | 84.92(4)  | C2   | C1   | C3   | 116.3(12) |
| Br2                                                         | Pb1  | Br1 <sup>1</sup> | 82.84(4)  | C5   | C6   | C7   | 118.6(18) |
| Br1                                                         | Pb1  | Br1 <sup>1</sup> | 167.59(3) | C3   | C4   | C5   | 119.3(16) |
| Pb1                                                         | Br1  | Pb1 <sup>2</sup> | 82.48(3)  | C3   | C8   | C7   | 121.5(15) |
| C4                                                          | C3   | C1               | 121.1(13) | C6   | C7   | C8   | 120.2(18) |
| C8                                                          | C3   | C1               | 120.4(12) | C6   | C5   | C4   | 121.8(16) |
| <sup>1</sup> 1/2+X,3/2-Y,1-Z; <sup>2</sup> -1/2+X,3/2-Y,1-Z |      |                  |           |      |      |      |           |

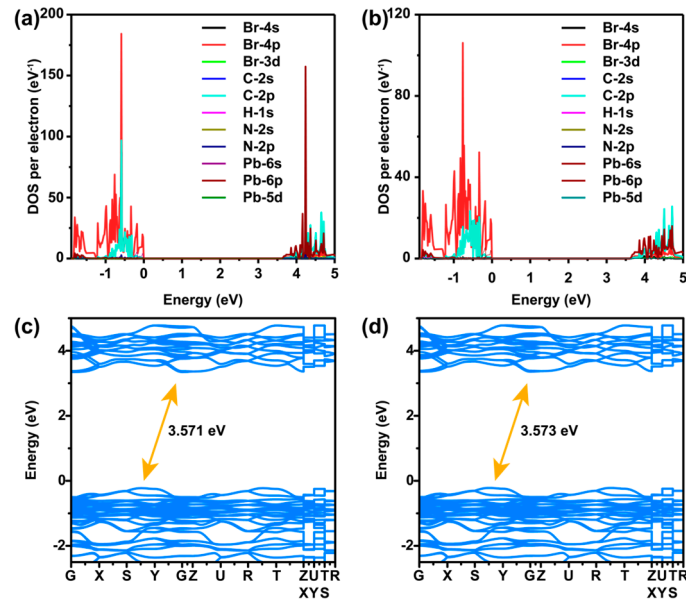

**Figure S2.** The electronic structures of MBAPbBr<sub>3</sub>. (a-b) The PDOS of *R*-MBAPbBr<sub>3</sub> (a) and *S*-MBAPbBr<sub>3</sub> (b). (c-d) The band structures of *R*-MBAPbBr<sub>3</sub> (c) and *S*-MBAPbBr<sub>3</sub> (d).



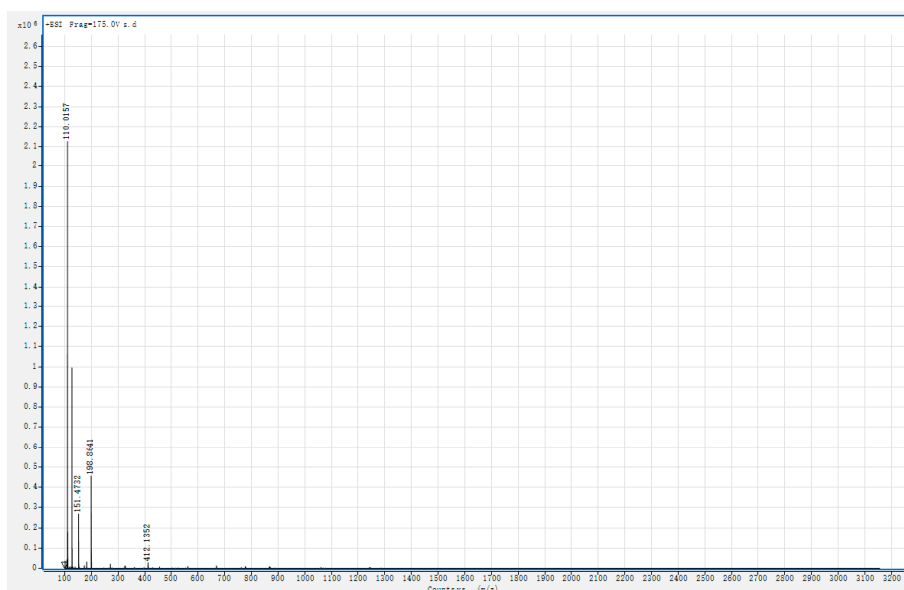

**Figure S6.** The mass spectrum (MS) of *S*-MBAPbBr<sub>3</sub>.

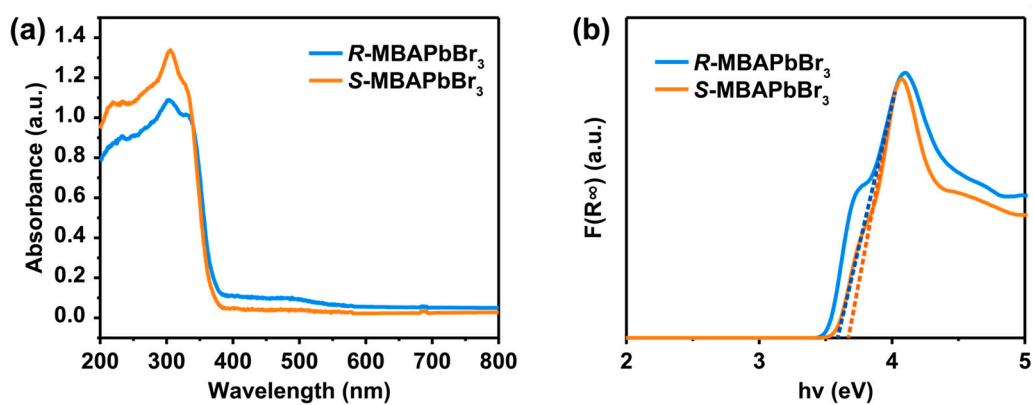

**Figure S7.** (a) The UV–Vis absorption spectra of MBAPbBr<sub>3</sub>. (b) The band gap of MBAPbBr<sub>3</sub> fitted by the Kubelka–Munk function.

**Table S7.** Summary of the elastic properties of *S*-MBAPbBr<sub>3</sub>. All the elastic tensors are obtained from DFT calculations. The maximal and minimal values of Young's modulus ( $E$ ) and shear modulus ( $G$ ) were determined by using the ELATE software. Anisotropy of  $X$  is denoted by  $A_X = X_{\max}/X_{\min}$ .

| S-MBAPbBr <sub>3</sub> |                        |       |
|------------------------|------------------------|-------|
| $G_{ij}$<br>(GPa)      | $C_{11}$               | 20.04 |
|                        | $C_{22}$               | 13.20 |
|                        | $C_{33}$               | 20.98 |
|                        | $C_{44}$               | 2.76  |
|                        | $C_{55}$               | 19.46 |
|                        | $C_{66}$               | 4.40  |
|                        | $C_{12}$               | 3.31  |
|                        | $C_{13}$               | 8.58  |
|                        | $C_{23}$               | -5.27 |
| $E$<br>(GPa)           | $E_{\max}=E<101>$      | 33.2  |
|                        | $E_{\min}=E<011>$      | 6.5   |
|                        | $A_E$                  | 5.1   |
| G<br>(GPa)             | $G_{\max}=G(001)<010>$ | 19.5  |
|                        | $G_{\min}=G(001)<100>$ | 2.8   |
|                        | $A_G$                  | 7.0   |
| Bulk modulus (GPa)     |                        | 7.3   |
